# Supplementary material for: Enhanced stability of an intrinsically disordered protein against proteolytic cleavage through interactions with silver nanoparticles
Source: Royal Society of Chemistry journal article supplement (doi:10.1039/c9ra05514b), 2019-01-01
Supplement: c9ra05514b1.pdf [file c9ra05514b1.pdf]

## Supplementary information

### Enhanced Stability of an Intrinsically Disordered Protein against Proteolytic Cleavage through Interactions with Silver Nanoparticles

Shahid A. Malik<sup>1,2a</sup>, Somnath Mondal<sup>1,2a</sup> & Hanudatta S. Atreya<sup>1,2\*</sup>

#### Author affiliation:

<sup>1</sup> Department of Solid State and Structural Chemistry Unit, Indian Institute of Science,  
Bangalore-560012, India.

<sup>2</sup> NMR Research Centre, Indian Institute of Science, Bangalore-560012, India.

<sup>a</sup> Authors contribute equally to this work.

\* Corresponding author:

#### Hanudatta S. Atreya

Department of Solid State and Structural Chemistry Unit and NMR Research Centre, Indian Institute of  
Science, Bangalore-560012, India

(email: [hsatreya@iisc.ac.in](mailto:hsatreya@iisc.ac.in))

Tel: +91-80-2293-3302; Fax: +91-80-2360-1550

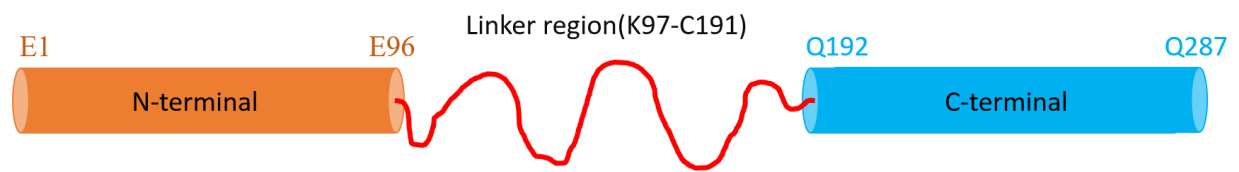

**Figure S1:** The schematic representation of the full length hIGFBP2 with three domains in different colors. The orange region represents the N-terminal domain (residues from E1 to E96), region in red represents the intrinsically disordered middle domain (K97-C191) and the blue region represents the C-terminal domain (Q192-Q287) of the protein. The N- and the C- termini have some structure while as middle region remains disordered.

(a)

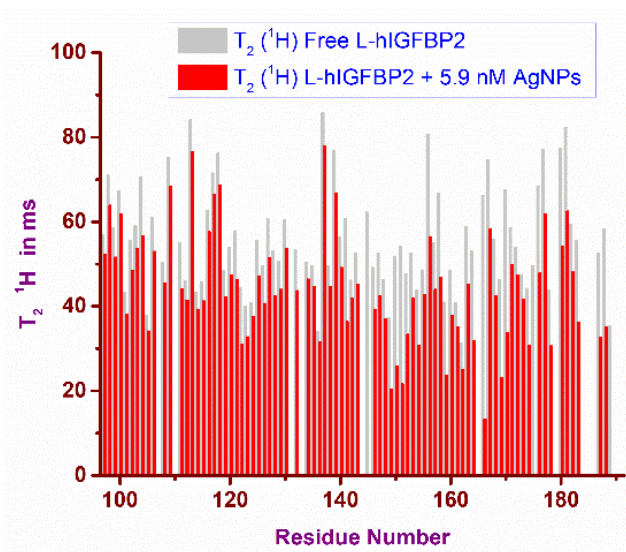

(b)

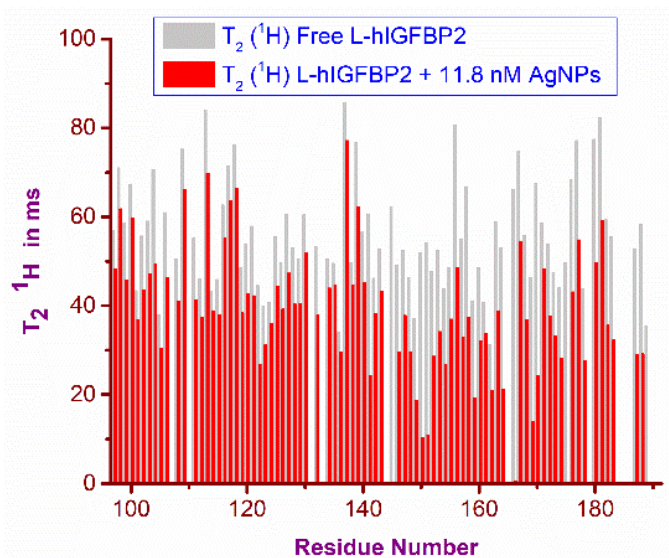

(c)

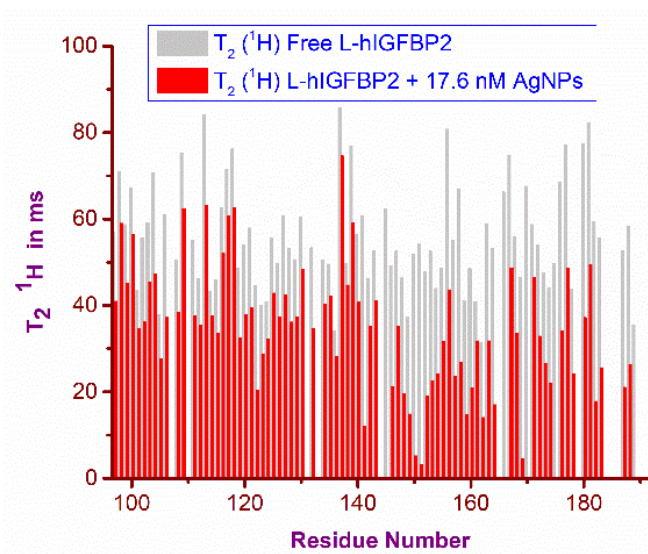

(d)

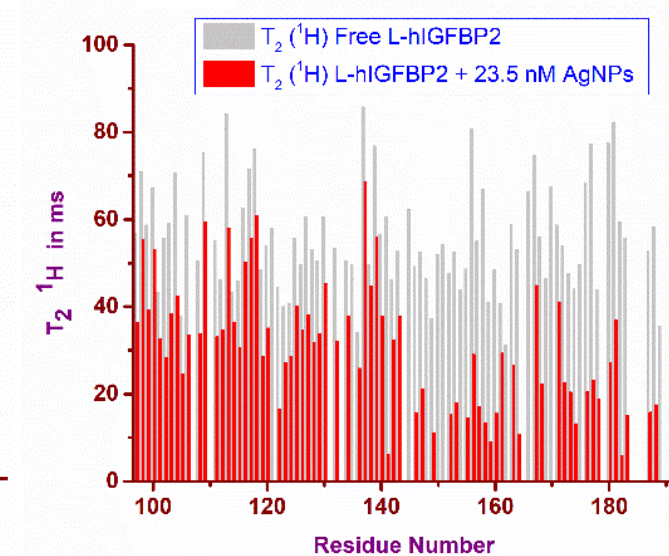

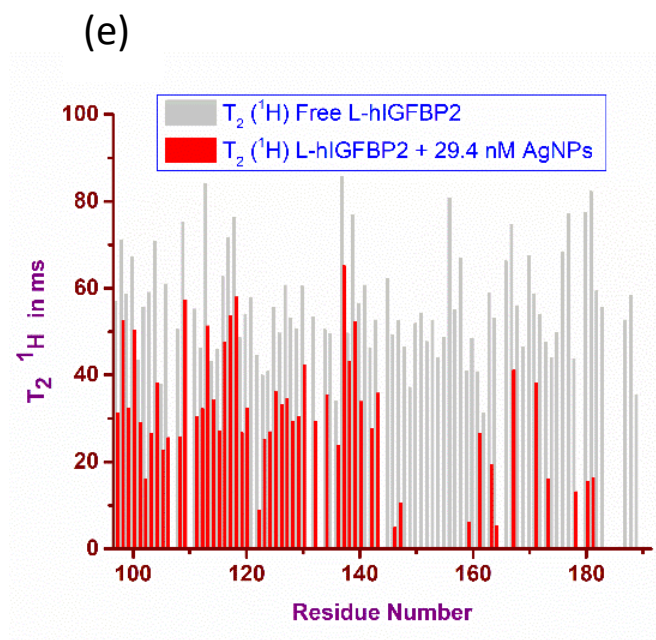

**Figures S2 (a-e):** The overlay of the  $T_2 \text{ } ^1\text{H}_N$  (in ms) of free protein with that in presence of the indicated concentrations of the AgNPs.



**Table 1:** The measured  $T_2$  ( $^1H_N$ ) values for the free and the AgNP-bound protein at different indicated concentrations of the added AgNPs

| Residue name | Residue number | $T_2$ $^1H_N$ (ms) |                   |                    |                    |                    |                    |
|--------------|----------------|--------------------|-------------------|--------------------|--------------------|--------------------|--------------------|
|              |                | Free L-hIGFBP2     | with 5.9 nM AgNPs | with 11.8 nM AgNPs | with 17.6 nM AgNPs | with 23.5 nM AgNPs | with 29.4 nM AgNPs |
| K            | 97             | 56.8±6.6           | 52.3±5.5          | 48.3±4.5           | 40.9±3.1           | 36.4±2.3           | 31.3±1.6           |
| R            | 98             | 71±10.9            | 63.9±8.6          | 61.8±8             | 58.9±7.2           | 55.4±6.2           | 52.5±5.5           |
| R            | 99             | 58.7±7.1           | 51.6±5.3          | 45.8±4             | 45.2±3.9           | 39.3±2.8           | 32.3±1.7           |
| D            | 100            | 67.2±9.7           | 61.8±8            | 59.8±7.4           | 56.4±6.5           | 53.1±5.7           | 50.4±5             |
| A            | 101            | 43.4±3.5           | 38.2±2.6          | 36.9±2.4           | 34.7±2.1           | 32.5±1.8           | 29.1±1.3           |
| E            | 102            | 55.7±6.3           | 48.4±4.6          | 43.4±3.5           | 36.2±2.3           | 28.4±1.2           | 16.2±0.3           |
| Y            | 103            | 59±7.2             | 53.7±5.8          | 47.2±4.3           | 45.5±3.9           | 38.4±2.6           | 26.6±1             |
| G            | 104            | 70.7±10.8          | 56.6±6.5          | 49.5±4.8           | 47.4±4.3           | 42.4±3.3           | 38.2±2.6           |
| A            | 105            | 37.9±2.6           | 34.2±1.9          | 30.4±1.5           | 27.7±1.2           | 24.7±0.9           | 22.8±0.7           |
| S            | 106            | 60.9±7.7           | 53±5.6            | 46.3±4.1           | 37.2±2.4           | 33.5±1.9           | 25.6±1             |
| P            | 107            | -                  | -                 | -                  | -                  | -                  | -                  |
| E            | 108            | 50.5±5.0           | 45.5±3.9          | 40.9±3.07          | 38.4±2.6           | 33.8±1.9           | 25.8±1             |
| Q            | 109            | 75.2±12.4          | 68.5±10.1         | 66.2±9.3           | 62.4±8.2           | 59.4±7.3           | 57.2±6.7           |
| V            | 110            | -                  | -                 | -                  | -                  | -                  | -                  |
| A            | 111            | 55.1±6.2           | 44.1±3.7          | 41.3±3.2           | 37.5±2.5           | 33.1±1.8           | 30.3±1.5           |
| D            | 112            | 46.1±4.1           | 41.5±3.2          | 37.3±2.5           | 35.5±2.2           | 34.6±2             | 32.3±1.7           |
| N            | 113            | 84.1±15.8          | 76.5±12.9         | 69.8±10.5          | 63.1±8.4           | 58±6.9             | 51.3±5.2           |
| G            | 114            | 43.2±3.5           | 39.3±2.8          | 38.9±2.7           | 37.6±2.5           | 36.3±2.3           | 34.1±2             |
| D            | 115            | 45.9±4             | 41.3±3.1          | 38.1±2.6           | 33.5±1.9           | 30.7±1.5           | 27.1±1.1           |
| D            | 116            | 62.7±8.3           | 57.6±6.8          | 55.1±6.2           | 52±5.4             | 50.1±5             | 47.6±4.4           |
| H            | 117            | 71.5±11.1          | 66.5±9.4          | 63.62±8.5          | 60.8±7.7           | 55.8±6.3           | 53.6±5.8           |
| S            | 118            | 76.2±12.8          | 68.6±10.1         | 66.3±9.4           | 62.5±8.2           | 60.95±7.8          | 57.9±6.9           |
| E            | 119            | 48.6±4.6           | 42.24±3.3         | 38.4±2.6           | 32.5±1.8           | 28.6±1.3           | 26.7±1.1           |
| G            | 120            | 54±5.9             | 47.5±3.3          | 42.6±3.4           | 37.8±2.5           | 35.1±2.1           | 32.4±1.7           |
| G            | 121            | 57.9±6.9           | 46.3±4.1          | 42.2±3.3           | 39.3±2.8           | -                  | -                  |
| L            | 122            | 44.5±3.8           | 31.2±1.6          | 26.7±1.1           | 20.5±0.5           | 16.5±0.3           | 8.9±0              |
| V            | 123            | 40±2.9             | 32.8±1.8          | 31.2±1.6           | 28.8±1.3           | 27.2±1.1           | 25.2±1             |
| E            | 124            | 40.8±3.1           | 37.6±2.5          | 35.9±2.3           | 32.3±1.7           | 28.6±1.3           | 26.9±1.1           |
| N            | 125            | 55.6±6.3           | 47.3±4.3          | 44.5±3.8           | 42.8±3.4           | 40±2.9             | 36.1±2.3           |
| H            | 126            | 49.6±4.8           | 40.7±3            | 39.2±2.8           | 37.2±2.5           | 34.7±2.1           | 33.3±1.9           |
| V            | 127            | 60.6±7.7           | 51.5±5.3          | 47.3±4.3           | 42.5±3.4           | 38.2±2.6           | 34.6±2             |
| D            | 128            | 53.1±5.7           | 42.5±3.4          | 40.4±3             | 36.1±2.3           | 31.9±1.7           | 29.2±1.3           |
| S            | 129            | 50.6±5.1           | 44±3.7            | 40.5±3             | 37.4±2.5           | 33.9±1.9           | 30.3±1.5           |
| T            | 130            | 60.4±7.6           | 53.8±5.8          | 52±5.4             | 48.4±4.6           | 45.3±3.9           | 42.3±3.3           |
| M            | 131            | -                  | -                 | -                  | -                  | -                  | -                  |
| N            | 132            | 53.3±5.7           | 43.7±3.6          | 37.9±2.6           | 34.7±2.1           | 32±1.7             | 29.3±1.4           |

|   |     |           |          |           |           |           |          |
|---|-----|-----------|----------|-----------|-----------|-----------|----------|
| M | 133 | -         | -        | -         | -         | -         | -        |
| L | 134 | 50.5±5    | 46.5±4.2 | 43.9±3.6  | 40.4±3    | 38±2.6    | 35.3±2.2 |
| G | 135 | 49.5±4.8  | 44.6±3.8 | 44.6±3.8  | 42.1±3.3  | -         | -        |
| G | 136 | 34.1±2    | 31.7±1.6 | 29.6±1.4  | 28.3±1.2  | 25.9±1    | 23.9±0.8 |
| G | 137 | 85.7±16.6 | 78±13.5  | 77.2±13.1 | 74.6±12.2 | 68.6±10.1 | 65.2±9   |
| G | 138 | 49.6±4.8  | 44.7±3.8 | 44.7±3.8  | 44.7±3.8  | 44.7±3.8  | 43.2±3.5 |
| S | 139 | 76.8±13   | 66.8±9.6 | 62.2±8.1  | 59.1±7.2  | 56.1±6.4  | 52.2±5.4 |
| A | 140 | 56.5±6.5  | 49.2±4.7 | 45.21±3.9 | 40.7±3    | 37.9±2.6  | 33.9±2   |
| G | 141 | 60.7±7.7  | 36.4±2.3 | 24.3±0.8  | 12.1±0.1  | 6.1±0     | -        |
| R | 142 | 46.1±4.1  | 42±3.3   | 38.3±2.6  | 35.1±2.1  | 32.3±1.7  | 27.7±1.2 |
| K | 143 | 52.7±5.6  | 45.3±3.9 | 43.2±3.5  | 41.1±3.1  | 37.9±2.6  | 35.8±2.2 |
| P | 144 | -         | -        | -         | -         | -         | -        |
| L | 145 | 62.3±8.1  | -        | -         | -         | -         | -        |
| K | 146 | 49.2±4.7  | 39.4±2.8 | 29.5±1.4  | 21.2±0.6  | 15.7±0.2  | 4.9±0    |
| S | 147 | 52.6±5.5  | 42.6±3.4 | 37.8±2.6  | 35.2±2.1  | 21±0.6    | 10.5±0   |
| G | 148 | 46.3±4.1  | 37.1±2.4 | 29.7±1.4  | 19.5±0.5  | -         | -        |
| M | 149 | 37.2±2.4  | 20.4±0.5 | 18.6±0.4  | 14.9±0.2  | 11.2±0.1  | -        |
| K | 150 | 51.9±5.4  | 25.9±1   | 10.4±0.1  | 5.2±0     | -         | -        |
| E | 151 | 54.1±5.9  | 21.7±0.6 | 10.83±0.1 | 3.2±0     | -         | -        |
| L | 152 | 47.7±4.4  | 33.4±1.9 | 28.62±1.3 | 19.1±0.4  | 15.3±0.2  | -        |
| A | 153 | 52.6±5.5  | 42.1±3.3 | 34.16±2   | 22.6±0.7  | 17.9±0.4  | -        |
| V | 154 | 43.9±3.6  | 30.7±1.5 | 26.78±1.1 | 24.2±0.8  | -         | -        |
| F | 155 | 48.6±4.6  | 42.8±3.4 | 36.94±2.4 | 31.6±1.6  | 14.6±0.2  | -        |
| R | 156 | 80.7±14.5 | 56.5±6.5 | 48.43±4.6 | 43.6±3.6  | 29.1±1.3  | -        |
| E | 157 | 55±6.1    | 44±3.7   | 33±1.8    | 23.7±0.8  | 17.1±0.3  | -        |
| K | 158 | 66.8±9.5  | 46.8±4.2 | 37.4±2.5  | 26.7±1.1  | 13.4±0.1  | -        |
| V | 159 | 41±3.1    | 23.8±0.8 | 19.3±0.4  | 14.8±0.2  | 9±0       | 6.2±0    |
| T | 160 | 48.5±4.6  | 37.8±2.5 | 32±1.7    | 20.8±0.5  | 15.5±0.2  | -        |
| E | 161 | 40.8±3    | 35.1±2.1 | 33.8±1.9  | 31.8±1.7  | 29.4±1.4  | 26.5±1.1 |
| Q | 162 | 31.3±1.6  | 25±0.9   | 21±0.6    | 14.1±0.2  | -         | -        |
| H | 163 | 58.9±7.2  | 45.3±3.9 | 38.9±2.7  | 31.8±1.7  | 26.5±1    | 19.4±0.4 |
| R | 164 | 53.1±5.7  | 31.8±1.7 | 21.2±0.6  | 17±0.3    | 10.6±0.1  | 5.3±0    |
| Q | 165 | -         | -        | -         | -         | -         | -        |
| M | 166 | 66.2±9.4  | 13.3±0.1 | 0.7±0.3   | -         | -         | -        |
| G | 167 | 74.7±12.2 | 58.3±7   | 54.5±6    | 48.6±4.6  | 44.8±3.8  | 41.1±3.1 |
| K | 168 | 55.9±6.4  | 42.5±3.4 | 36.9±2.4  | 33.5±1.9  | 22.4±0.7  | -        |
| G | 169 | 46.4±4.1  | 23.2±0.7 | 13.9±0.2  | 4.6±0     | -         | -        |
| G | 170 | 67.5±9.8  | 33.8±1.9 | 24.3±0.8  | -         | -         | -        |
| K | 171 | 58.7±7.1  | 49.9±4.9 | 48.1±4.5  | 46.4±4.1  | 41.1±3.1  | 38.2±2.6 |
| H | 172 | 53.9±5.9  | 47.4±4.4 | 37.7±2.5  | 32.9±1.8  | 22.6±0.7  | -        |
| H | 173 | 47.5±4.4  | 41.8±3.2 | 33.3±1.9  | 26.6±1.1  | 20.4±0.5  | 16.2±0.3 |
| L | 174 | 44±3.7    | 30.8±1.5 | 28.2±1.2  | 22±0.6    | 13.2±0.1  | -        |
| G | 175 | 49.7±4.9  | -        | -         | -         | -         | -        |
| L | 176 | 68.4±10   | 47.9±4.5 | 43.1±3.5  | 34.2±0.6  | 20.5±0.5  | -        |
| E | 177 | 77.2±13.1 | 61.7±8   | 54.8±6.1  | 48.6±4.6  | 23.2±0.7  | -        |
| E | 178 | 43.8±3.6  | 30.6±1.5 | 27.6±1.2  | 24.1±0.8  | 18.8±0.4  | 13.1±0.1 |
